# Supplementary material for: A systematic review on the application of machine learning in carbon dioxide absorption in amine-related solvents
Source: publisher site journal article supplement (doi:10.1515/revce-2024-0047), 2024-12-30
Supplement: Supplementary file 1 [file j_revce-2024-0047_suppl_001.docx]

**Supplementary Material**

**A systematic review on the application of machine learning in carbon dioxide absorption in amine-related solvents**

Jun Hui Law et al.

DOI 10.1515/revce-2024-0047

|  |  |
| --- | --- |

**Supplementary Figure S1:** Activation functions commonly used in artificial neural network model.


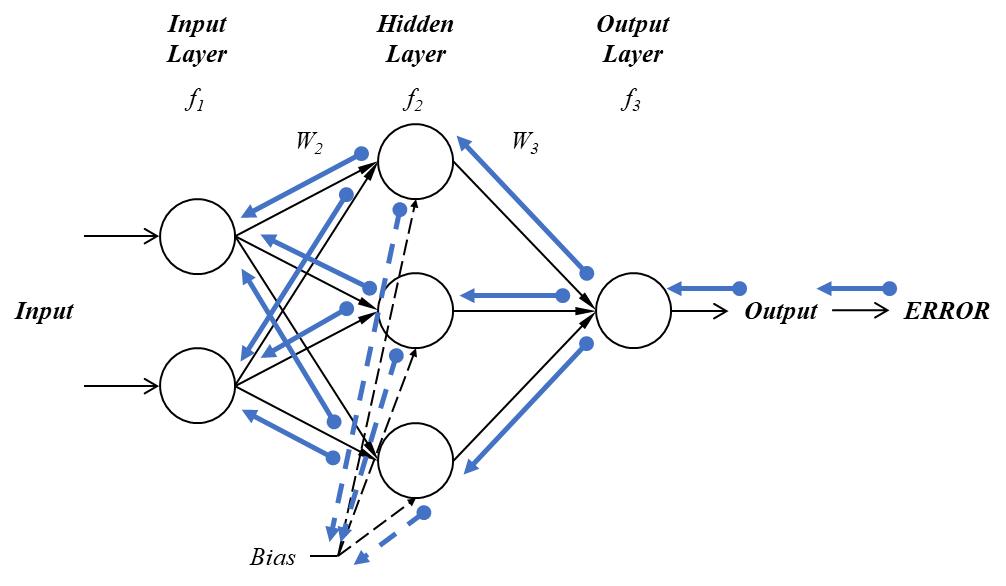


**Supplementary Figure S2:** Backpropagation of error (blue arrows unconnected to neurons) for updating weights and bias.


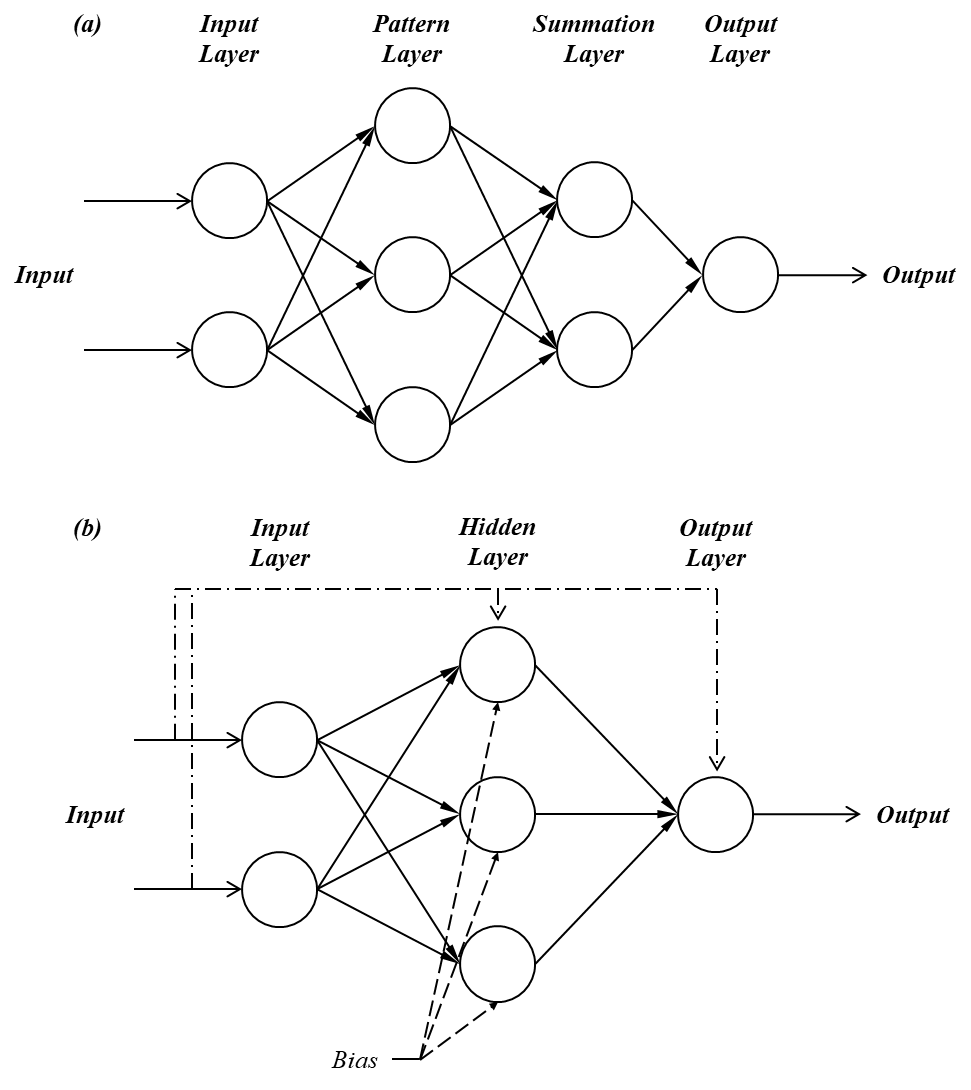


**Supplementary Figure S3:** General structure of (a) GRNN model and (b) CFNN model.

**Supplementary Table S1:** Top five most-cited articles in the field of machine learning applications in predicting CO2 solubility in amine-related solvents.

| Title | First author | Year | TCa | TCb | TCc |
| --- | --- | --- | --- | --- | --- |
| Prediction of CO2 loading capacities of aqueous solutions of absorbents using different computational schemes | Baghban A. | 2017 | 75 | 57 | 73 |
| Application of ANFIS soft computing technique in modelling the CO2 capture with MEA, DEA, and TEA aqueous solutions | Ghiasi M. M. | 2016 | 69 | 49 | 64 |
| Application of artificial neural networks for estimation of solubility of acid gases (H2S and CO2) in 32 commonly ionic liquid and amine solutions | Hamzehie M. E. | 2015 | 60 | - | 60 |
| Developing a feed forward multilayer neural network model for prediction of CO2 solubility in blended aqueous amine solutions | Hamzehie M. E. | 2014 | 21 | 56 | 21 |
| Mining the intrinsic trends of CO2 solubility in blended solutions | Li H. | 2018 | 57 | 26 | 54 |

a Scopus, b ScienceDirect,c Web of Science.

**Supplementary Table S2:** Studies on comparing ‘tansig’, ‘purelin’, ‘satlin’, ‘hardlim’, ‘hardlims’ and ‘tribas’ activation function in hidden neurons of BPNN model.

| Author | Solvent | Remark |
| --- | --- | --- |
| Hamzehie et al. (2014) | Single and blended aqueous solutions of monoethanolamine, diethanolamine, N-methyldiethanolamine, 2-amino-2-methyl-1-propanol, triethanolamine, piperazine, and diisopropanolamine | All the studies agreed that implementation of *tansig* function gives the highest accuracy to the BPNN model. The nonlinear property of the activation function enhances the accuracy of the model. *hardlim* and *hardlims* have the lowest accuracy due to the extreme constants, i.e., 1 and 0 or 1 and -1, allocated for computed results. |
| Hamzehie et al. (2015) | Combination of 32 different ionic liquids and amines, including single and blended aqueous solutions of monoethanolamine, diethanolamine, N-methyldiethanolamine, 2-piperidineethanol, triethanolamine, N-methylpyrrolidone, 1-amino-2-propanol, piperazine, and 2-amino-2-methyl-1-propanol |
| Hamzehie et al. (2016a) | Blended aqueous solutions of 2-amino-2-methyl-1-propanol and amino acid salts of potassium |
| Hamzehie et al. (2016b) | Blended aqueous solution of potassium glycinate and piperazine |
| Hamzehie et al. (2016c) | Single and blended aqueous and non-aqueous solutions of various ionic liquids, amino acid salts and amines, including monoethanolamine, diethanolamine, N-methyldiethanolamine, 2-piperidineethanol, triethanolamine, N-methylpyrrolidone, 1-amino-2-propanol, piperazine, and 2-amino-2-methyl-1-propanol |
| Khalilzadeh et al. (2019) | The combination of Hamzehie et al. (2016a), Hamzehie et al. (2016b) and Hamzehie et al. (2016c). |

**Supplementary Table S3:** Studies on comparing ‘tansig’ and ‘logsig’ activation function in hidden neuron of BPNN model.

| Author | Solvent | Remark |
| --- | --- | --- |
| Chen et al. (2015) | 12 single aqueous solution of monoethanolamine, diethanolamine, N-methyldiethanolamine, 2-amino-2-methyl-1-propanol, piperazine, triisopropanolamine, monopropanolamine, 4-(diethylamino)-2-butanol, 2-(diethylamino)-ethanol, methyl aminoethanol, and 3-(methylamino)-propylamine | No detailed comparison was done, however, *tansig* function is used as the activation function in 11 out of 12 BPNN models developed |
| Valeh-e-Sheyda et al. (2022) | Single and blended aqueous and non-aqueous solutions of 43 ionic liquids and amines, including monoethanolamine, diethanolamine, N-methyldiethanolamine, diisopropylamine, and 2-amino-2-methyl-1-propanol | Both agreed *tansig* function exhibits slightly better performance compared to *logsig* function. |
| Li et al. (2021) | Blended aqueous solution of monoethanolamine, N-methyldiethanolamine, and piperazine |

**Supplementary Table S4:** Abbreviations of amine used in the studies of application of machine learning in the past 10 years.

| No. | Amine | Abbreviations | Structure | No. | Amine | Abbreviations | Structure |
| --- | --- | --- | --- | --- | --- | --- | --- |
| 1 | *Monoethanolamine* | *MEA* | *Prim* | 19 | *Tris(2-aminoethyl)amine* | *TAEA* | *Poly* |
| 2 | *Diethanolamine* | *DEA* | *Sec* | 20 | *1-Diethylamino-2-propanol* | *1DEA2P* | *Tert* |
| 3 | *Triethanolamine* | *TEA* | *Tert* | 21 | *1-Dimethylamino-2-propanol* | *1DMA2P* | *Tert* |
| 4 | *N-Methyldiethanolamine* | *MDEA* | *Tert* | 22 | *4-Dimethylamino-2-butanol* | *DMAB* | *Tert* |
| 5 | *2-Amino-2-methyl-1-propanol* | *AMP* | *SH* | 23 | *4-(Dipropylamino)-2-butanol* | *DPAB* | *Tert* |
| 6 | *Piperazine* | *PZ* | *Poly* | 24 | *1-(2-Hydroxyethyl)pyrrolidone* | *1-(2-HE)PRLD* | *Tert* |
| 7 | *4-((2-Hydroxyethyl)(ethylamino)-2-butanol* | *HEEAB* | *Tert* | 25 | *3-Diethanolamine-1,2-propanediol* | *3DEA-1,2-PD* | *Tert* |
| 8 | *1-(2-Hydroxyethyl)-piperidine* | *1-(2-HE)PP* | *Tert* | 26 | *4-((2-hydroxyethyl)(methyl)amino)-2-butanol* | *HEMAB* | *Tert* |
| 9 | *2-Butylaminoethanol* | *BEA* | *Sec* | 27 | *N-Methyl-2-pyrrolidone* | *NMP* | *Tert* |
| 10 | *Diisopropanolamine* | *DIPA* | *Sec* | 28 | *Bis(3-aminopropyl)amine* | *APA* | *Poly* |
| 11 | *Aminoethylpiperazine* | *AEP* | *Poly* | 29 | *4-Diethylamino-2-butanol* | *DEAB* | *Tert* |
| 12 | *2-(Diethylamino)ethanol* | *DEEA* | *Tert* | 30 | *Benzylamine* | *BZA* | *Prim* |
| 13 | *2-Methylpiperazine* | *MPZ* | *Poly* | 31 | *2-Amino-2-hydroxymethyl-1,3-propanediol* | *AHPD* | *SH* |
| 14 | *2-Amino-2-methyl-1,3-propanediol* | *AMPD* | *SH* | 32 | *N-(3-Aminopropyl)-1,3-propanediamine* | *APDA* | *Poly* |
| 15 | *1-Amino-2-propanol* | *1A2P* | *Prim* | 33 | *3-(Methylamino)propylamine* | *MAPA* | *Poly* |
| 16 | *Triisopropanolamine* | *TIPA* | *Tert* | 34 | *Monopropanolamine* | *MPA* | *Prim* |
| 17 | *2-(Methylamino)ethanol* | *MAE* | *Sec* | 35 | *2-Piperidineethanol* | *PDEA* | *Sec* |
| 18 | *3-Dimethylamino-1-propanol* | *3DMA1P* | *Tert* | 36 | *Triethylenetriamine* | *TETA* | *Poly* |

Notes: Prim = primary amine, Sec = secondary amine, Tert = tertiary amine, Poly = polyamine, SH = sterically hindered amine.

**Supplementary Table S5:** Summary of datapoints used in studies.

| No. | Amine involved | Amine concentration | | | T (K) | | PCO2 (kPa) | | Loading (mol CO2 /mol amine) | | References |
| --- | --- | --- | --- | --- | --- | --- | --- | --- | --- | --- | --- |
| Min | Max | Unit | Min | Max | Min | Max | Min | Max |
| 1 | *1-(2HE)PRLD HEEAB 3DEA1,2P DPAB 1-(2-HE)PP HEMAB DMAB* | *-* | *2* | *M* | *298* | *333* | *3* | *101* | *0* | *1* | (Liu et al. 2019) |
| 2 | *1DEA2P 1DMA2P 1-(2-HE)PP* | *1* | *5* | *M* | *298* | *333* | *11.02* | *99.48* | *~0.05* | *~1.05* | (Liu et al. 2022) |
| 3 | *1DMA2P 1DEA2P DEEA DEAB* | *1 (DEAB) 1 (DEEA) 1 (1DMA2P)* | *5 (DEAB) 4 (DEEA) 5 (1DMA2P) 2 (1DEA2P)* | *M* | *293 (DEAB) 293 (DEEA) 293 (1DMA2P) 298 (1DEA2P)* | *333 (DEAB) 353 (DEEA) 333 (1DMA2P) 333 (1DEA2P)* | *10 (DEAB) 6.2 (DEEA) 3 (1DMA2P) 8 (1DEA2P)* | *100 (DEAB) 100.08 (DEEA) 101 (1DMA2P) 101 (1DEA2P)* | *~0.09* | *~1.05* | (Afkhamipour et al. 2018) |
| 4 | *3DMA1P* | *1* | *3* | *M* | *298* | *333* | *3* | *101* | *~0.15* | *~0.9* | (Li et al. 2017) |
| 5 | *AEP AMP* | *0.1 (AEP, S) 0.05 (AEP, B) 0.15 (AMP, B)* | *0.4 (AEP, S) 0.25 (AEP, B) 0.35 (AMP, B)* | *wt/wt* | *303.2* | *323.2* | *1.701 (S) 4.21 (B)* | *211 (S) 254 (B)* | *0.156 (S) 0.213 (B)* | *1.322 (S) 1.155 (B)* | (Dey et al. 2019) |
| 6 | *AEP APA* | *0.503 (AEP) 0.504 (APA)* | *1.004 (AEP) 0.996 (APA)* | *mol/kg H2O* | *303.15* | *323.15* | *1* | *244* | *0.003* | *1.656* | (Balchandani et al. 2023) |
| 7 | *AEP MDEA* | *0.05 (AEP) 0.15 (MDEA)* | *0.25 (AEP) 0.35 (MDEA)* | *wt/wt* | *303.2* | *323.3* | *3.59* | *286.68* | *0.196* | *1.187* | (Dey et al. 2018) |
| 8 | *AHPD AMP AMPD MEA DEA MDEA PDEA PZ TEA DIPA NMP* | *1.8* | *100* | *wt/wt* | *298* | *478.15* | *0.0851* | *18900* | *0.055* | *4.063* | (Hamzehie et al. 2016c) |
| 9 | *AHPD AMP AMPD MEA MDEA PDEA  PZ TEA DEA* | *0.0118* | *0.6992* | *wt/wt* | *293* | *478.15* | *0.0851* | *20000* | *0.1656* | *3.5908* | (Bastani et al. 2013) |
| 10 | *AHPD AMP AMPD MEA MDEA PDEA PZ TEA DEA* | *0.0118* | *0.6992* | *wt/wt* | *293* | *478.15* | *0.0851* | *18900* | *~0.1* | *~3.6* | (Baghban et al. 2017) |
| 11 | *AHPD MEA AMP MDEA DEA AMPD TEA PDEA PZ* | *0.05* | *0.7* | *mol/mol* | *293* | *478.15* | *0.09* | *20000* | *0.51* | *1.423* | (Yarveicy et al. 2019) |
| 12 | *AHPD PZ* | *0.13 (AHPD, S/B) 0 (PZ)* | *0.25 (AHPD, S/B) 0.1035 (PZ)* | *wt/wt* | *303.15* | *333.15* | *500* | *60000* | *0.905 (S) 0.82 (B)* | *1.88 (S) 3.56 (B)* | (Murshid et al. 2020) |
| 13 | *AMP* | *0.01* | *0.1* | *wt/wt* | *293.15* | *323.15* | *2.9* | *1382.4* | *0.21* | *3.726* | (Hamzehie et al. 2016a) |
| 14 | *AMP* | *0.082* | *0.306* | *wt/wt* | *313.15* | *353.15* | *1.08* | *303.7* | *0.0561* | *1.066* | (Pakzad et al. 2020) |
| 15 | *AMP PZ* | *0.01* | *0.1* | *wt/wt* | *293.15* | *323.15* | *2.9* | *2583.9* | *0.205* | *5.393* | (Khalilzadeh et al. 2019) |
| 16 | *APDA AMP MDEA* | *0.1 (APDA, S) 0.04 (APDA, B) 0.2 (MDEA, B) 0.2 (AMP, B)* | *0.4 (APDA, S) 0.1 (APDA, B) 0.26 (MDEA, B) 0.26 (AMP, B)* | *wt/wt* | *303.2* | *323.2* | *2* | *200* | *0.334 (S) 0.22 (B, MDEA) 0.301 (B, AMP)* | *2.096 (S) 1.173 (B, MDEA) 1.097 (B, AMP)* | (Dey et al. 2020b) |
| 17 | *BZA AEEA* | *0.2 (BZA) 0.02 (AEEA)* | *0.28 (BZA) 0.1 (AEEA)* | *wt/wt* | *313.15* | *333.15* | *0.2* | *219* | *0.244* | *0.829* | (Mukherjee et al. 2018) |
| 18 | *DEA* | *2* | *4* | *M* | *298.15* | *380.57* | *9* | *7017* | *0.184* | *1.273* | (Ghiasi et al. 2017) |
| 19 | *DEA* | *NA* | *NA* |  | *NA* | *NA* | *NA* | *NA* | *NA* | *NA* | (Rauf et al. 2020) |
| 20 | *DEA MDEA* | *0 (DEA) 0 (MDEA)* | *4 (DEA) 4 (MDEA)* | *M* | *303* | *323* | *0.1* | *107.1* | *0.01* | *0.88* | (Abooali et al. 2020) |
| 21 | *DEA MDEA* | *0.5 (DEA) 0.5 (MDEA)* | *3 (DEA) 3 (MDEA)* | *M* | *303* | *323* | *0.1* | *107.1* | *0.01* | *0.88* | (Saghafi et al. 2017b) |
| 22 | *DEA TETA MPZ AMP* | *0* | *1.96* | *M* | *303* | *323* | *2.05* | *49.18* | *0.502* | *1.354* | (Li et al. 2018) |
| 23 | *DEAB* | *1* | *2.5* | *M* | *298* | *333* | *0* | *100* | *~0.5* | *~1.0* | (Meesattham et al. 2020) |
| 24 | *MAPA DEEA* | *0 (MAPA) 0 (DEEA)* | *2 (MAPA) 5 (DEEA)* | *M* | *313.15* | *393.15* | *0.3* | *577.1* | *0.015* | *1.875* | (Soleimani et al. 2018) |
| 25 | *MDEA* | *1* | *4* | *M* | *298* | *363* | *10* | *100* | *0.041* | *0.748* | (Sairi et al. 2015) |
| 26 | *MDEA NMP* | *-* | *-* |  | *273.15* | *423.15* | *300* | *20450* | *0.0591* | *2.46* | (Tatar et al. 2016b) |
| 27 | *MDEA PZ* | *0 (MDEA) 0 (PZ)* | *1 (MDEA) 0.09 (PZ)* | *wt/wt* | *293.15* | *373.15* | *0.177* | *3938.4* | *0.033* | *1.361* | (Golzar et al. 2016) |
| 28 | *MDEA TEA MEA DEA* | *0.3* | *0.45* | *wt/wt* | *313.15* | *393.15* | *4* | *2016* | *0.204* | *3.368* | (Hamzehie et al. 2015) |
| 29 | *MEA* | *0.5* | *2* | *M* | *303* | *323* | *2.64* | *47.52* | *0.511* | *1.05* | (Zhang et al. 2018) |
| 30 | *MEA* | *1* | *4* | *M* | *303* | *333* | *1* | *15* | *0.00088* | *0.93* | (Babamohammadi et al. 2018) |
| 31 | *MEA* | *3* | *5* | *M* | *298.15* |  | *NA* | *NA* | *0.0261* | *1.2838* | (Hanafiah et al. 2021) |
| 32 | *MEA AMP BEA* | *0 (MEA) 0 (AMP) 0 (BEA)* | *0.45 (MEA) 0.37 (AMP) 0.64 (BEA)* | *wt/wt* | *293* | *393* | *0.0016* | *791* | *0.028* | *1.026* | (Li et al. 2022) |
| 33 | *MEA DEA MDEA AMP PZ TIPA MPA 1A2P DEAB MAPA* | *0.1* | *13.32* | *M* | *293.15* | *473.15* | *0.1* | *10000* | *0.015* | *2.152* | (Chen et al. 2015) |
| 34 | *MEA DEA MDEA AMP PZ TIPA MPA 1A2P DEAB MAPA* | *0.0574455* | *5* | *M* | *283* | *422* | *0.00144* | *7017* | *~0.01* | *~4.75* | (Dashti et al. 2020) |
| 35 | *MEA DEA MDEA AMP TEA PZ DIPA* | *0.18* | *0.8* | *wt/wt* | *298.15* | *453.15* | *0.604* | *19914* | *0.141* | *2.078* | (Hamzehie et al. 2014) |
| 36 | *MEA DEA MDEA DIPA AMP* | *30 (DEA) 30 (MDEA) 30 (DIPA) 5 (MEA) 30 (AMP)* | *40 (DEA) 50 (MDEA) 40 (DIPA) 20 (MEA) 40 (AMP)* | *wt/wt* | *278.12* | *450.49* | *0.01* | *100120* | *0* | *0.915* | (Valeh-e-Sheyda et al. 2022) |
| 37 | *MEA DEA TEA* | *0.1836 (MEA) 0.0575 (DEA) 0.5 (TEA)* | *5 (MEA) 4 (DEA) 5 (TEA)* | *M* | *298.15* | *400* | *1.26* | *7017* | *0.006* | *4.762* | (Ghiasi et al. 2019) |
| 38 | *MEA DEA TEA* | *0.1836 (MEA) 0.0575 (DEA) 0.5 (TEA)* | *5 (MEA) 4 (DEA) 5 (TEA)* | *M* | *298.15 (MEA) 298.15 (DEA) 298.15 (TEA)* | *393.15 (MEA) 399.82 (DEA) 353.2 (TEA)* | *8.2167 (MEA) 9 (DEA) 1.264 (TEA)* | *6000 (MEA) 7017 (DEA) 153.4 (TEA)* | *0.1766 (MEA) 0.006 (DEA) 0.034 (TEA)* | *1.068 (MEA) 4.7619 (DEA) 0.976 (TEA)* | (Ghiasi et al. 2014) |
| 39 | *MEA DEA TEA* | *0.1836 (MEA) 0.0575 (DEA) 0.5 (TEA)* | *5 (MEA) 4 (DEA) 5 (TEA)* | *M* | *298.15 (MEA) 298.15 (DEA) 298.15 (TEA)* | *393.15 (MEA) 399.82 (DEA) 353.2 (TEA)* | *8.2167 (MEA) 9 (DEA) 1.264 (TEA)* | *6000 (MEA) 7017 (DEA) 153.4 (TEA)* | *0.1766 (MEA) 0.006 (DEA) 0.034 (TEA)* | *1.068 (MEA) 4.7619 (DEA) 0.976 (TEA)* | (Ghiasi et al. 2016) |
| 40 | *MEA DEA TEA MDEA* | *0.1836 (MEA) 0.0575 (DEA) 0.5 (TEA) 0.24 (MDEA)* | *5 (MEA) 4 (DEA) 5 (TEA) 4.28 (MDEA)* | *M* | *298.15 (MEA) 298.15 (DEA) 298.15 (TEA) 283 (MDEA)* | *393.15 (MEA) 399.82 (DEA) 353.2 (TEA) 373.15 (MDEA)* | *8.2167 (MEA) 9 (DEA) 1.264 (TEA) 0.02 (MDEA)* | *6000 (MEA) 7017 (DEA) 153.4 (TEA) 986.8 (MDEA)* | *0.1766 (MEA) 0.006 (DEA) 0.034 (TEA) 0.0087 (MDEA)* | *1.068 (MEA) 4.7619 (DEA) 0.976 (TEA) 1.105 (MDEA)* | (Saghafi et al. 2017a) |
| 41 | *MEA MDEA DEA AMP DIPA* | *2* | *4* | *M* | *298* | *353* | *50* | *6200* | *0.014* | *0.365* | (Balchandani et al. 2022) |
| 42 | *MEA MDEA PZ* | *0.1 (A) 0 (B, MEA) 0 (B, MDEA) 0 (B, PZ)* | *0.6098 (A) 0.45 (B, MEA) 0.9 (B, MDEA) 0.249 (B, PZ)* | *wt/wt* | *303 (A)* | *393 (A)* | *0.06 (A) 0.0016 (B)* | *1368 (A) 6489 (B)* | *0.044 (A) 0.005 (B)* | *2.03 (A) 2.77 (B)* | (Li et al. 2021) |
| 43 | *APDA 1DMA2P* | *0.02 (APDA) 0.2 (1DMA2P)* | *0.1 (APDA) 0.28 (1DMA2P)* | *wt/wt* | *303.2* | *323.2* | *2* | *200* | *0.234* | *1.134* | (Dey et al. 2020a) |
| 44 | *PZ* | *0.01* | *0.1* | *wt/wt* | *293.15* | *323.15* | *5.1* | *2508.7* | *0.314* | *7.908* | (Hamzehie et al. 2016b) |
| 45 | *PZ* | *5 (B, PZ)* | *10 (S, PZ) 11.11 (B, PZ)* | *wt/wt* | *303.15* | *333.15* | *200* | *1036* | *0.11* | *4.47* | (Safdar et al. 2018) |
| 46 | *PZ* | *0.2* | *4.5* | *M* | *298* | *343* | *0.032* | *1487* | *0.16* | *2.956* | (Dashti et al. 2019) |
| 47 | *PZ* | *0.1* | *8* | *mol/kg H2O* | *287* | *395* | *0.0215* | *9510.3* | *0.0519* | *2.96* | (Norouzbahari et al. 2015) |
| 48 | *PZ* | *0.2* | *4.5* | *M* | *298* | *343.15* | *0.032* | *1487* | *0.16* | *2.956* | (Tatar et al. 2016a) |
| 49 | *PZ* | *0.099* | *7.708* | *M* | *287.1* | *393.15* | *0.03* | *9560* | *0.097* | *2.956* | (Yarveicy et al. 2018) |
| 50 | *TAEA MDEA AMP* | *0.1 (TAEA) 2.3 (MDEA) 2.3 (AMP)* | *0.7 (TAEA) 2.9 (MDEA) 2.9 (AMP)* | *M* | *293.15* | *323.15* | *2* | *500* | *0.34* | *1.26* | (Tellagorla et al. 2021) |
| 51 | *MEA*  *AMP*  *TEA*  *MDEA* | *0.3* | *0.55* | *wt/wt* | *303.15* | *393.15* | *0.4* | *2908* | *~0.2* | *~1.1* | (Amirkhani et al. 2023) |
| 52 | *MDEA*  *PZ* | *0.44 (S, MDEA)*  *0.4 + 0.5 (B, MDEA + PZ)* | *10 (MDEA)*  *7.7 + 5 (B, MDEA, PZ)* | *Mol/kg H2O* | *297.82 (S) 283.15 (B)* | *393 (S) 433 (B)* | *0.1* | *5* | *0.01* | *0.996 (S) 0.984 (B)* | (Babaei layaei et al. 2024) |
| 53 | *AEEA* | *0.1* | *0.3* | *wt/wt* | *313.15* | *343.15* | *84* | *5448* | *0.8446* | *1.9191* | (Hasanzadeh et al. 2023) |
| 54 | *PZ*  *DEA* | *0.2 (DEA)*  *0 (PZ)* | *0.4 (DEA)*  *0.1 (PZ)* | *wt/wt* | *303* | *343.2* | *100* | *1000* | *0.425* | *1.024* | (Khoshraftar et al. 2023) |
| 55 | *AMP*  *PZ* | *0.01* | *0.1* | *wt/wt* | *293.15* | *323.15* | *8.9* | *2008.1* | *~0.2* | *~3.0* | (Amirkhani et al. 2023) |

Note: 1. *S* denotes single amine solution, B denotes blended solution of amines. 2. Row highlighted in red refers to combination of aqueous and non-aqueous system.

**Supplementary Table S6:** Summary of machine learning models used in studies.

| No. | ML | Input (others) | Training/optimisation | Number of datapoints | Compared thermodynamic model(s) | References |
| --- | --- | --- | --- | --- | --- | --- |
|
| 1 | *NN* |  | *1. BPNN = Neural network toolbox in MATLAB 2. RBFNN = Neural network toolbox in MATLAB* | *80* | *1. Helei-Liu model 2. Liu et al. model 3. KE model 4. Austgen model 5. Li-Shen model 6. Hu-Chakma model* | *(Liu et al. 2019)* |
| 2 | *1. NN 2. DT* |  | *1. NA 2. Extreme Gradient Boosting (XGBoost)* | *NA* |  | *(Liu et al. 2022)* |
| 3 | *NN* | *Molecular weight* | *LM* | *225* | *1. KE model (and modified KE) 2. DM model* | *(Afkhamipour et al. 2018)* |
| 4 | *NN* |  | *1. BPNN = NA 2. RBFNN = NA* | *44* | *1. KE model 2. Austgen model 3. Hu-Chakma model 4. Liu et al. model* | *(Li et al. 2017)* |
| 5 | *NN* |  | *LM* | *173 (S) 120 (B)* | *KE model* | *(Dey et al. 2019)* |
| 6 | *NN* | *NA* | *LM* | *62 85 (B, AEP)  76 (B, APA)* | *-* | *(Balchandani et al. 2023)* |
| 7 | *NN* |  | *LM* | *126* | *KE model* | *(Dey et al. 2018)* |
| 8 | *NN* | *1. pH of solution 2. Apparent Molecular Weight 3. Critical temperature 4. Critical pressure* | *LM* | *2982* | *-* | *(Hamzehie et al. 2016c)* |
| 9 | *NN* | *Molecular weight* | *LM + BR* | *656* | *-* | *(Bastani et al. 2013)* |
| 10 | *1. NN 2. ANFIS 3. LSSVM* | *Molecular weight* | *1. BPNN = LM  2. RBFNN = LM 3. LSSVM = Genetic Algorithm 4. ANFIS = PSO* | *656* | *-* | *(Baghban et al. 2017)* |
| 11 | *DT* | *Molecular weight* | *Ensemble method* | *656* | *-* | *(Yarveicy et al. 2019)* |
| 12 | *NN* | *Molecular weight* | *LM* | *63 (S) 189 (B)* | *-* | *(Murshid et al. 2020)* |
| 13 | *NN* | *Molecular weight* | *LM + BR* | *185* | *DM model* | *(Hamzehie et al. 2016a)* |
| 14 | *NN* |  | *Quasi-Newton optimisation* | *139* | *1. KE model 2. DM model* | *(Pakzad et al. 2020)* |
| 15 | *NN* | *1. Molecular weight 2. Density* | *LM + BR* | *740* | *-* | *(Khalilzadeh et al. 2019)* |
| 16 | *NN* |  | *NA* | *171 (S) 72 (B, MDEA) 72 (B, AMP)* | *KE model* | *(Dey et al. 2020b)* |
| 17 | *NN* |  | *LM* | *131* | *1. KE model 2. Soft model* | *(Mukherjee et al. 2018)* |
| 18 | *1. NN 2. LSSVM 3. ANFIS 4. CMIS* |  | *1. MLP-ANN (BPNN) = NA 2. GA-RBFNN = GA 3. CSA-LSSVM = CSA 4. Hybrid-ANFIS = MATLAB built-in tuning 5. PSO-ANFIS = PSO 6. CMIS = GA* | *103* | *-* | *(Ghiasi et al. 2017)* |
| 19 | *NN* | *1. Gas volume 2. Gas temp. 3. Gas pressure 4. H2S in sour gas 5. CO2 in sour gas 6. H2O in sour gas 7. Lean amine volume 8. Lean amine temp. 9. Lean amine pressure 10. H2S in lean amine 11. CO2 in lean amine 12. H2O in lean amine *concentrations in mol/mol* | *LM + BR* | *79* | *-* | *(Rauf et al. 2020)* |
| 20 | *1. DT*  *2. GP* |  | *1. SGB 2. NA* | *175* | *-* | *(Abooali et al. 2020)* |
| 21 | *DT* |  | *NA* | *175* | *-* | *(Saghafi et al. 2017b)* |
| 22 | *NN* |  | *General regression* | *299* | *-* | *(Li et al. 2018)* |
| 23 | *NN* |  | *LM* | *66* | *-* | *(Meesattham et al. 2020)* |
| 24 | 1. *DT* 2. *GP* |  | *1. SGB 2. NA* | *313* | *KE model* | *(Soleimani et al. 2018)* |
| 25 | *NN* |  | *QP* | *24* | *-* | *(Sairi et al. 2015)* |
| 26 | *1. NN 2. LSSVM 3. ANFIS 4. CMIS* |  | *1. MLP-ANN (BPNN) = NA 2. GA-RBFNN = GA 3. CSA-LSSVM = CSA 4. Hybrid-ANFIS = GA 5. PSO-ANFIS = PSO 6. CMIS = NA* | *43* | *-* | *(Tatar et al. 2016b)* |
| 27 | *NN* | *1. Molecular weight 2. Acentric factor* | *LM* | *1371* | *-* | *(Golzar et al. 2016)* |
| 28 | *NN* | *1. Molecular weight 2. Critical Temperature 3. Critical Pressure* | *LM* | *114* | *-* | *(Hamzehie et al. 2015)* |
| 29 | *NN* |  | *1. BPNN = NA 2. General Regression* | *78* | *-* | *(Zhang et al. 2018)* |
| 30 | *NN* |  | *LM* | *55* | *-* | *(Babamohammadi et al. 2018)* |
| 31 | *NN* | *NA* | *NA* | *173* | *Modified KE model* | *(Hanafiah et al. 2021)* |
| 32 | *NN* | *Molecular weight* | *LM* | *500* | *KE model* | *(Li et al. 2022)* |
| 33 | *NN* |  | *1. BPNN = LM 2. RBFNN = Neural network toolbox in MATLAB* | *2599* | *-* | *(Chen et al. 2015)* |
| 34 | *1. ANFIS 2. LSSVM 3. NN* | *1. Mw 2. HBA and HBD count 3. Rotatable Bond Count* | *1. GA-ANFIS = GA 2. PSO-ANFIS = PSO  3. CSA-LSSVM = CSA 4. RBFNN = Trial-and-error* | *2458* | *-* | *(Dashti et al. 2020)* |
| 35 | *NN* | *Molecular weight* | *LM + BR* | *632* | *-* | *(Hamzehie et al. 2014)* |
| 36 | *1. NN 2. LSSVM* | *1. Molecular weight 2. Density 3. Water content 4. No of atoms, i.e., C, O, H, S 5. No of Bonds, i.e., C-C, S=O, N-O, C-F, S-O, etc. 6. HBD, HBA, rotatable bond count* | *1. FFNN (BPNN) = LMBP + Gradient descent with momentum + Adaptive learning rate propagation (GDX) 2. RBFNN = Trial-and-error 3. LSSVM = NA* | *498* | *-* | *(Valeh-e-Sheyda et al. 2022)* |
| 37 | *1. NN 2. DT* |  | *1. MLFFNN (BPNN) = NA 2. AdaBoost-CART = AdaBoost* | *103 (MEA) 343 (DEA) 63 (TEA)* | *-* | *(Ghiasi et al. 2019)* |
| 38 | *LSSVM* |  | *CSA* | *103 (MEA) 343 (DEA) 63 (TEA)* | *-* | *(Ghiasi et al. 2014)* |
| 39 | *ANFIS* |  | *MATLAB Built-in Tuning* | *103 (MEA) 343 (DEA) 63 (TEA)* | *-* | *(Ghiasi et al. 2016)* |
| 40 | *1. NN 2. DT 3. LSSVM (for MDEA)* |  | *1. BPNN = NA 2. AdaBoost-CART DT = Adaptive Boosting algorithm 3. SVM = CSA* | *103 (MEA) 343 (DEA) 63 (TEA) 221 (MDEA)* | *-* | *(Saghafi et al. 2017a)* |
| 41 | *NN* |  | *1. LM  2. Bias Learning Function Gradient Descent (BLFGD) + Momentum Weight 3. Bias Learning Function (BLF)* | *972* | *-* | *(Balchandani et al. 2022)* |
| 42 | *NN* | *A: MDEA/PZ  1. Molecular weight  B: MDEA/MEA/PZ 1. Molecular weight* | *LM* | *427 (A) 301 (B)* | *-* | *(Li et al. 2021)* |
| 43 | *NN* |  | *LM* | *111* | *KE model* | *(Dey et al. 2020a)* |
| 44 | *NN* | *Molecular weight* | *LM + BR* | *211* | *DM model* | *(Hamzehie et al. 2016b)* |
| 45 | *NN* |  | *LM* | *60* | *-* | *(Safdar et al. 2018)* |
| 46 | *1. ANFIS 2. GP* |  | *1. GA 2. NA* | *390* | *-* | *(Dashti et al. 2019)* |
| 47 | *NN* |  | *LM + BR* | *594* | *-* | *(Norouzbahari et al. 2015)* |
| 48 | *1. ANFIS 2. LSSVM* |  | *1. ANFIS = PSO 2. LSSVM = CSA* | *390* | *-* | *(Tatar et al. 2016a)* |
| 49 | *1. NN 2. ANFIS 3. LSSVM 4. DT* |  | *1. BPNN = LM 2. ANFIS = Hybrid 3. LSSVM = CSA 4. AdaBoost-CART = Adaptive Boosting* | *577* | *-* | *(Yarveicy et al. 2018)* |
| 50 | *NN* |  | *LM* | *144* | *Modified KE model* | *(Tellagorla et al. 2021)* |
| 51 | 1. *NN* 2. *ANFIS* 3. *LSSVM* | *Molecular weight* | 1. *RBFNN = GA* 2. *ANFIS = PSO and Hydrid* 3. *LSSVM = CSA* | *413* | *-* | *(Amirkhani et al. 2023)* |
| 52 | *NN* |  | *MATLAB Built-in tuning* | *303 (S)*  *361 (MDEA + PZ)* | *-* | *(Babaei layaei et al. 2024)* |
| 53 | *NN* | 1. *[Water]* 2. *[Sulfolane]* | *LM, SCG, BR* | *179* | *-* | *(Hasanzadeh et al. 2023)* |
| 54 | *1. NN*  *2. LSSVM* | *CO2 Fraction* | *LM, SCG, BR* | *540* | *-* | *(Khoshraftar et al. 2023)* |
| 55 | *1. NN 2. ANFIS 3. LSSVM* | *Molecular weight* | 1. *ANFIS = Hybrid, PSO* 2. *LSSVM = CSA* | *375* | *-* | *(Amirkhani et al. 2023)* |

Note: 1. All the inputs to the machine learning approaches include Temperature, Partial Pressure of CO2, and Amine Concentration, unless otherwise stated. 2. All NN models refer to BPNN model, unless otherwise stated. 3. Row highlighted in red refers to combination of aqueous and non-aqueous system.

**Supplementary Table S7:** Summary of model development and availability of models.

| No. | Number of datapoints | Platform / software used | Data splitting (%) | | | Data normalisation / standardisation | Accessibility | References |
| --- | --- | --- | --- | --- | --- | --- | --- | --- |
| Training | Testing | Validation |
| 1 | *80* | *MATLAB* | *NA* | *NA* | *NA* | *NA* | *Unavailable* | (Liu et al. 2019) |
| 2 | *NA* | *NA* | *75* | *25* | *0* | *-1 to 1* | *Included weights and biases for BPNN* | (Liu et al. 2022) |
| 3 | *225* | *Thought to be carried out in MATLAB* | *75* | *25* | *0* | *0 to 1* | *Unavailable* | (Afkhamipour et al. 2018) |
| 4 | *44* | *NA* | *NA* | *NA* | *NA* | *NA* | *Unavailable* | (Li et al. 2017) |
| 5 | *173 (S) 120 (B)* | *NA* | *NA* | *NA* | *NA* | *NA* | *Unavailable* | (Dey et al. 2019) |
| 6 | *62 85 (B, AEP)  76 (B, APA)* | *NA* | *NA* | *NA* | *NA* | *NA* | *Unavailable* | (Balchandani et al. 2023) |
| 7 | *126* | *Thought to be carried out in MATLAB* | *70* | *15* | *15* | *NA* | *Unavailable* | (Dey et al. 2018) |
| 8 | *2982* | *MATLAB* | *70* | *20* | *10* | *0 to 1* | *Included for all ML models* | (Hamzehie et al. 2016c) |
| 9 | *656* | *MATLAB* | *75* | *25* | *0* | *-1 to 1* | *Included for all ML models* | (Bastani et al. 2013) |
| 10 | *656* | *MATLAB* | *75* | *25* | *0* | *-1 to 1* | *Included for all ML models* | (Baghban et al. 2017) |
| 11 | *656* | *Python* | *90* | *10* | *0* | *NA* | *Included in the Supporting Information of the work* | (Yarveicy et al. 2019) |
| 12 | *63 (S) 189 (B)* | *NA* | *70* | *15* | *15* | *-1 to 1* | *Unavailable* | (Murshid et al. 2020) |
| 13 | *185* | *NA* | *67* | *33* | *0* | *NA* | *Unavailable* | (Hamzehie et al. 2016a) |
| 14 | *139* | *Thought to be carried out in MATLAB* | *75* | *25* | *0* | *0 to 1* | *Unavailable* | (Pakzad et al. 2020) |
| 15 | *740* | *NA* | *70* | *20* | *10* | *-1 to 1* | *Unavailable* | (Khalilzadeh et al. 2019) |
| 16 | *171 (S) 72 (B, MDEA) 72 (B, AMP)* | *NA* | *NA* | *NA* | *NA* | *NA* | *Unavailable* | (Dey et al. 2020b) |
| 17 | *131* | *NA* | *75* | *15* | *15* | *NA* | *Unavailable* | (Mukherjee et al. 2018) |
| 18 | *103* | *MATLAB* | *80* | *20* | *0* | *-1 to 1* | *Downable files of the ML model* | (Ghiasi et al. 2017) |
| 19 | *79* | *NA* | *70* | *15* | *15* | *NA* | *Unavailable* | (Rauf et al. 2020) |
| 20 | *175* | *Thought to be carried out in MATLAB* | *85* | *15* | *0* | *NA* | *Included for all ML models* | (Abooali et al. 2020) |
| 21 | *175* | *NA* | *90* | *10* | *0* | *NA* | *Included for all ML models* | (Saghafi et al. 2017b) |
| 22 | *299* | *NA* | *70* | *30* | *0* | *NA* | *Unavailable* | (Li et al. 2018) |
| 23 | *66* | *NA* | *50* | *50* | *0* | *NA* | *Unavailable* | (Meesattham et al. 2020) |
| 24 | *313* | *NA* | *90* | *10* | *0* | *NA* | *Unavailable* | (Soleimani et al. 2018) |
| 25 | *24* | *NA* | *NA* | *NA* | *NA* | *NA* | *Unavailable* | (Sairi et al. 2015) |
| 26 | *43* | *MATLAB* | *80* | *20* | *0* | *-1 to 1* | *Available for all ML models, except BPNN* | (Tatar et al. 2016b) |
| 27 | *1371* | *MATLAB* | *70* | *15* | *15* | *NA* | *Included for all ML models* | (Golzar et al. 2016) |
| 28 | *114* | *MATLAB* | *70* | *22.5* | *7.5* | *0 to 1* | *Included for all ML models* | (Hamzehie et al. 2015) |
| 29 | *78* | *NA* | *90* | *10* | *0* | *NA* | *Unavailable* | (Zhang et al. 2018) |
| 30 | *55* | *MATLAB* | *70* | *15* | *15* | *-1 to 1* | *Unavailable* | (Babamohammadi et al. 2018) |
| 31 | *173* | *MATLAB* | *60-70* | *30-40* | *0* | *NA* | *Unavailable* | (Hanafiah et al. 2021) |
| 32 | *500* | *MATLAB* | *85* | *15* | *0* | *0 to 1* | *Included for all ML models* | (Li et al. 2022) |
| 33 | *2599* | *MATLAB* | *75* | *25* | *0* | *-1 to 1* | *Unavailable* | (Chen et al. 2015) |
| 34 | *2458* | *NA* | *75* | *25* | *0* | *NA* | *Included for all ML models, except BPNN* | (Dashti et al. 2020) |
| 35 | *632* | *MATLAB* | *79* | *21* | *0* | *0 to 1* | *Included for all ML models* | (Hamzehie et al. 2014) |
| 36 | *498* | *MATLAB* | *70* | *15* | *15* | *0 to 1* | *Included in the Supporting Information of the work* | (Valeh-e-Sheyda et al. 2022) |
| 37 | *103 (MEA) 343 (DEA) 63 (TEA)* | *NA* | *90* | *10* | *0* | *NA* | *Unavailable* | (Ghiasi et al. 2019) |
| 38 | *103 (MEA) 343 (DEA) 63 (TEA)* | *NA* | *NA* | *NA* | *NA* | *0.15 to 0.85* | *Included for all ML models* | (Ghiasi et al. 2014) |
| 39 | *103 (MEA) 343 (DEA) 63 (TEA)* | *MATLAB* | *70* | *30* | *0* | *-1 to 1* | *Included for all ML models* | (Ghiasi et al. 2016) |
| 40 | *103 (MEA) 343 (DEA) 63 (TEA) 221 (MDEA)* | *NA* | *90* | *10* | *0* | *NA* | *Only included for LSSVM* | (Saghafi et al. 2017a) |
| 41 | *972* | *Thought to be carried out in MATLAB* | *75* | *15* | *15* | *0 to 1* | *Unavailable* | (Balchandani et al. 2022) |
| 42 | *427 (A) 301 (B)* | *MATLAB* | *90 (A) 100 (B)* | *10 (B) 0 (B)* | *0* | *0 to 1* | *Included for all ML models* | (Li et al. 2021) |
| 43 | *111* | *Thought to be carried out in MATLAB* | *70* | *30* | *0* | *0 to 1* | *Unavailable* | (Dey et al. 2020a) |
| 44 | *211* | *NA* | *67* | *19* | *14* | *NA* | *Unavailable* | (Hamzehie et al. 2016b) |
| 45 | *60* | *NA* | *75* | *15* | *15* | *-1 to 1* | *Unavailable* | (Safdar et al. 2018) |
| 46 | *390* | *MATLAB* | *70* | *30* | *0* | *NA* | *Included for all ML models* | (Dashti et al. 2019) |
| 47 | *594* | *NA* | *78* | *22* | *0* | *-1 to 1* | *Included for all ML models* | (Norouzbahari et al. 2015) |
| 48 | *390* | *MATLAB* | *NA* | *NA* | *NA* | *NA* | *Included for all ML models* | (Tatar et al. 2016a) |
| 49 | *577* | *NA* | *NA* | *NA* | *NA* | *NA* | *Included for all ML models* | (Yarveicy et al. 2018) |
| 50 | *144* | *Thought to be carried out in MATLAB* | *NA* | *NA* | *NA* | *NA* | *NA* | (Tellagorla et al. 2021) |
| 51 | *413* | *MATLAB* | *80* | *20* | *0* | *NA* | *Included for all ML models* | (Amirkhani et al. 2023) |
| 52 | *303 (S)*  *361 (MDEA + PZ)* | *MATLAB* | *80* | *10* | *10* | *-1 to 1* | *Included for all ML models* | (Babaei layaei et al. 2024) |
| 53 | *179* | *Thought to be carried out in MATLAB* | *80* | *15* | *5* | *-1 to 1* | *Included for all ML models* | (Hasanzadeh et al. 2023) |
| 54 | *540* | *MATLAB* | *70* | *15* | *15* | *-1 to 1* | *Only included for BPNN* | (Khoshraftar et al. 2023) |
| 55 | *375* | *MATLAB* | *70* | *30* | *0* | *NA* | *Included for all ML models* | (Amirkhani et al. 2023) |

NA = information not available.

In most of the studies, MATLAB was selected to develop the machine learning models as it contains the machine learning models built-in functions that is easily accessible by the researchers. From this trend, it can be concluded that MATLAB is a matured platform that can be used in developing the machine learning models. In the studies covered, only one work developed the machine learning model using Python. However, this does not indicate that Python is not a suitable platform for developing the machine learning models. Instead, to further examine the effect of the platform (or software) selection on the performance of the machine learning models, more studies shall be conducted.

Data pre-processing is also a basic yet important step in developing a machine learning model. This step is crucial to ensure the validity and the generalisability of the machine learning models. Generally, data pre-processing includes data normalisation or standardisation and data splitting (García et al. 2015). Data normalisation can be done by using the *log-sig* (Mapped from -1 to 1) or *tan-sig* (Mapped from 0 to 1) formula. This step is important to ensure the data collected is not biased towards one end of the data set. Also, in most of the cases, it could improve the model performance by enhancing the convergence speed and accuracy of the model (García et al. 2015). Most of the researchers split the data into training set and testing set. Training set is used to train the machine learning model, while the testing set is used to test and further validate the developed machine learning models. In the studies, the experimental or literature data collected for the model development is split based on a certain portion, in which summarised in Supplementary Table S7. This step is essential to reduce the probability of over- or underfitting, where the model might behave poorly to the unseen data. Data splitting enhances the model generalisability and reduce the risk of affected by the noise in the data set (García et al. 2015). Upon reviewing the articles, sample-based method was used to split the data into training, testing and validation (if applicable) sets, despite group-based method splitting is an alternative to ensure the validity and generalisability of the machine learning models. Interestingly, some of the work included the molecular weight of the amine as one the inputs. This input is believed to generalise the model for predicting the CO2 solubility in different amine solutions.

**Reference**

García, S., Luengo, J. and Herrera, F. (2015). *Data preprocessing in data mining*. Switzerland, Springer International Publishing. doi: 10.1007/978-3-319-10247-4
